# Supplementary material
Source: Springer Nature journal article supplement (https://www.springermedizin.de/resource/supplementary/12885_2013_4409_MOESM13_ESM.pdf/9466360)
Supplement: MOESM13 [file 9466360]

**Additional file 13: Table S12.** Control tissues used in immunohistochemistry assays.

| Antibody           | Localization                                                 | Control Tissue                                                                                           |
|--------------------|--------------------------------------------------------------|----------------------------------------------------------------------------------------------------------|
| ACPP               | Cytoplasmic                                                  | Pancreas (islet cells) [9]; kidney (loops of Henle) [9]                                                  |
| ADAM9              | Cytoplasmic; frequent luminal positivity                     | Pancreas (islet cells) [10]                                                                              |
| ALDH1A2            | Cytoplasmic                                                  | Testis (seminiferous tubules) [11]; kidney (EC) [11]; liver (EC) [11]                                    |
| CASR               | Cytoplasmic; frequent membrane and luminal positivity        | Parathyroid (EC) [12]; kidney (EC) [12]; cerebral cortex (NC) [13]                                       |
| CCND1              | Nuclear                                                      | Mantle cell lymphoma [14]; breast cancer [14]                                                            |
| CCPG1 <sup>a</sup> | Cytoplasmic; membranous                                      | <i>Testis (sertoli cells); cerebral cortex (NC)</i>                                                      |
| CD34               | Cytoplasmic                                                  | Kidney (glomeruli and interstitial capillaries) [15]; lung (alveolar capillaries) [15]                   |
| CD44               | Membranous                                                   | Tonsil (lymphoid follicle mantle cells) [16]; DLBCL [17]; neuroblastoma (negative) [18]                  |
| CD44v6             | Membranous                                                   | Cervix (squamous epithelium) [19]; cervical cancer [19]; breast (myoepithelium) [20]; breast cancer [20] |
| CHGA               | Cytoplasmic; occasional perinuclear                          | Paraganglioma [21]; colon (endocrine cells) [22]                                                         |
| CHMP1A             | Cytoplasmic; nuclear                                         | Pancreas (ductal cells) [23]; kidney [24]                                                                |
| EI24               | Cytoplasmic; occasional membranous                           | Breast (myoepithelium) [25]; pancreas (islet cells) [26]                                                 |
| ENO2               | Cytoplasmic                                                  | Endometrium (nerve fibers) [27]                                                                          |
| GADD45B            | Cytoplasmic; frequent apical accentuation                    | Liver (hepatocytes) [28]; colon (decreased) [29]                                                         |
| HA (bHABP)         | Interstitial streaming/cytoplasmic; membranous; pericellular | Skin (basal and lower spinous squamous cells) [30]; colon (lamina propria) [31]                          |
| HAS2               | Cytoplasmic; frequent apical accentuation                    | Breast cancer [32]; breast (decreased) [32]; endometrial cancer [33]; endometrium (decreased) [33]       |
| HES6               | Nuclear; weak cytoplasmic                                    | Glioblastoma [34]                                                                                        |
| HMMR               | Cytoplasmic; nuclear; membranous                             | Endometrial cancer [35]; endometrium (decreased) [35]; breast cancer [36]; breast (decreased) [36]       |
| HOXC6              | Cytoplasmic; nuclear                                         | Breast cancer [37]                                                                                       |
| HYAL1              | Cytoplasmic; nuclear                                         | Kidney (EC and proximal tubules) [38]; spleen (endothelial cells) [38]                                   |
| IGF1               | Cytoplasmic; frequent luminal positivity                     | Colon (EC) [39]; pancreas [40]                                                                           |
| IQCK <sup>b</sup>  | Cytoplasmic; frequent apical accentuation                    | <i>Stomach (EC); adrenal cortex</i>                                                                      |
| MAP4K4             | Cytoplasmic; frequent apical accentuation                    | Liver (hepatocytes and endothelial cells) [41]                                                           |
| MKI67              | Nuclear                                                      | Lung (proliferating cells) [42]                                                                          |
| PAGE4              | Cytoplasmic; frequent supranuclear accentuation              | Endometrium (secretory cells) [43]; placenta (syncytiotrophoblasts) [43]                                 |
| PLIN2              | Cytoplasmic; lipid droplets                                  | Liver (hepatocytes) [44]; adrenal cortex [44]                                                            |
| PTEN               | Cytoplasmic; nuclear                                         | Thyroid (EC) [45]; kidney [46]                                                                           |
| SIAH2              | Nuclear                                                      | Colon cancer [47]; colon (decreased) [47]                                                                |
| SMAD4              | Cytoplasmic; nuclear                                         | Pancreas (islet, acinar, and ductal cells) [48]; breast (EC) [49]                                        |
| SOX9               | Cytoplasmic; nuclear                                         | Testis (sertoli cells) [50]; stomach (pit-gland transition zone) [51]                                    |
| SPP1               | Cytoplasmic                                                  | Kidney (distal tubules) [52]; endometrium (secretory cells) [52]                                         |
| SYP                | Cytoplasmic; membranous                                      | Colon cancer [53]; paraganglioma [53]                                                                    |
| TP53               | Nuclear                                                      | Lung cancer [54]                                                                                         |
|                    | Nuclear                                                      | Colon cancer [55]                                                                                        |

bHABP, biotinylated hyaluronan binding protein; DLBCL, diffuse large B-cell lymphoma; EC, epithelial cells; NC, neuronal cells

<sup>a</sup>CCPG1 is a novel protein lacking published tissue controls. Tissues described here are representative observations from our own tissue analyses.

<sup>b</sup>IQCK is a novel protein lacking published tissue controls. Tissues described here are representative observations from our own tissue analyses.
